# Supplementary material for: A worldwide population of Streptococcus pyogenes strains circulating among school-aged children in Auckland, New Zealand: a genomic epidemiology analysis
Source: PubMed Central journal article supplement — Lancet Reg Health West Pac. 2023 Nov 14;42:100964. doi: 10.1016/j.lanwpc.2023.100964 (PMC10684382; doi:10.1016/j.lanwpc.2023.100964), 2023-11-14
Supplement: mmc1.pdf [file mmc1.pdf]

## Supplementary information

**Supplementary Table 1:** Demographics of individuals with GAS isolates included in this study

| Demographic                                | GAS isolate from throat |      | GAS isolate from skin |      | Total  |      |
|--------------------------------------------|-------------------------|------|-----------------------|------|--------|------|
|                                            | n=357                   | %    | n=108                 | %    | N=465* | %    |
| <b>Age</b>                                 |                         |      |                       |      |        |      |
| 5-9 years                                  | 219                     | 61.3 | 67                    | 62.0 | 286    | 61.5 |
| 10-15 years                                | 138                     | 38.7 | 41                    | 38.0 | 179    | 38.5 |
| <b>Ethnicity</b>                           |                         |      |                       |      |        |      |
| Māori                                      | 118                     | 34.7 | 32                    | 29.6 | 150    | 33.5 |
| Pacific Peoples                            | 108                     | 31.8 | 48                    | 44.4 | 156    | 34.8 |
| NZ European/Other                          | 114                     | 33.5 | 28                    | 25.9 | 142    | 31.7 |
| <b>Sex</b>                                 |                         |      |                       |      |        |      |
| Male                                       | 214                     | 59.9 | 63                    | 58.3 | 277    | 59.6 |
| Female                                     | 143                     | 40.1 | 45                    | 41.7 | 188    | 40.4 |
| <b>NZiDep - socio-economic deprivation</b> |                         |      |                       |      |        |      |
| 0 (least deprived)                         | 5                       | 1.4  | 2                     | 1.9  | 7      | 1.5  |
| 1                                          | 13                      | 3.7  | 6                     | 5.7  | 19     | 4.2  |
| 2                                          | 19                      | 5.4  | 8                     | 7.5  | 27     | 5.9  |
| 3                                          | 23                      | 6.6  | 8                     | 7.5  | 31     | 6.8  |
| 4                                          | 18                      | 5.1  | 10                    | 9.4  | 28     | 6.1  |
| 5                                          | 38                      | 10.9 | 11                    | 10.4 | 49     | 10.7 |
| 6                                          | 57                      | 16.3 | 22                    | 20.8 | 79     | 17.3 |
| 7                                          | 66                      | 18.9 | 13                    | 12.3 | 79     | 17.3 |
| 8 (most deprived)                          | 111                     | 31.7 | 26                    | 24.5 | 137    | 30.0 |

\* Missing data, n=4

**Supplementary Figure 1: Distribution of the 25 most common *emm*-types in the total dataset (n = 469) and by prioritised ethnic groupings.** The *emm*-types are plotted in descending order of frequency (shown as number of isolates) and coloured by whether they are included in the 30-valent StreptAnova vaccine. Secondary y-axis shows the cumulative total proportion of isolates (red line) and the cumulative proportion of vaccine *emm*-type from the total isolates (red dashed line).

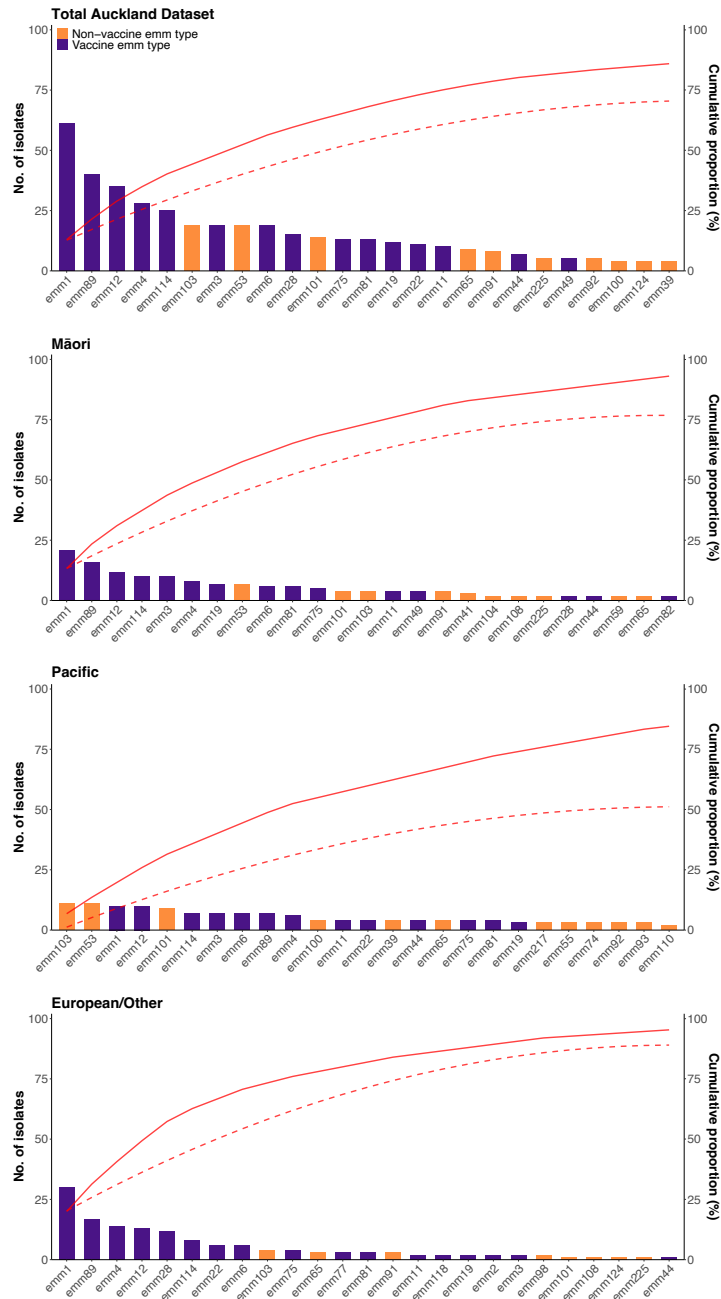

**Supplementary Table 2:** Contingency table for *emm*-type isolate count data and Chi-squared goodness-of-fit tests results

|                       | No. isolates |       |                 | Total isolates | <i>p</i> -value   |
|-----------------------|--------------|-------|-----------------|----------------|-------------------|
|                       | Māori        | Other | Pacific Peoples |                |                   |
| <i>emm1</i>           | 21           | 29    | 11              | 61             | <b>0.003*</b>     |
| <i>emm100</i>         | 0            | 0     | 4               | 4              | <b>0.022*</b>     |
| <i>emm101</i>         | 4            | 1     | 9               | 14             | <b>0.041*</b>     |
| <i>emm103</i>         | 4            | 4     | 11              | 19             | 0.099             |
| <i>emm104</i>         | 2            | 0     | 1               | 3              | 0.380             |
| <i>emm108</i>         | 2            | 1     | 0               | 3              | 0.366             |
| <i>emm11</i>          | 4            | 2     | 4               | 10             | 0.721             |
| <i>emm110</i>         | 0            | 0     | 2               | 2              | 0.149             |
| <i>emm114</i>         | 10           | 8     | 7               | 25             | 0.738             |
| <i>emm116</i>         | 0            | 0     | 2               | 2              | 0.149             |
| <i>emm118</i>         | 0            | 2     | 1               | 3              | 0.342             |
| <i>emm12</i>          | 12           | 13    | 10              | 35             | 0.720             |
| <i>emm124</i>         | 1            | 1     | 2               | 4              | 0.807             |
| <i>emm15</i>          | 1            | 0     | 1               | 2              | 0.626             |
| <i>emm183</i>         | 0            | 0     | 1               | 1              | 0.387             |
| <i>emm19</i>          | 7            | 2     | 3               | 12             | 0.186             |
| <i>emm2</i>           | 0            | 2     | 0               | 2              | 0.118             |
| <i>emm217</i>         | 0            | 0     | 3               | 3              | 0.058             |
| <i>emm22</i>          | 1            | 6     | 4               | 11             | 0.154             |
| <i>emm225</i>         | 2            | 1     | 2               | 5              | 0.849             |
| <i>emm28</i>          | 2            | 12    | 1               | 15             | <b>&lt;0.001*</b> |
| <i>emm3</i>           | 10           | 2     | 7               | 19             | 0.091             |
| <i>emm39</i>          | 0            | 0     | 4               | 4              | <b>0.022*</b>     |
| <i>emm4</i>           | 8            | 14    | 6               | 28             | 0.107             |
| <i>emm41</i>          | 3            | 0     | 0               | 3              | 0.052             |
| <i>emm42</i>          | 0            | 0     | 1               | 1              | 0.387             |
| <i>emm44</i>          | 2            | 1     | 4               | 7              | 0.411             |
| <i>emm49</i>          | 4            | 0     | 1               | 5              | 0.078             |
| <i>emm53</i>          | 7            | 1     | 11              | 19             | <b>0.026*</b>     |
| <i>emm55</i>          | 0            | 1     | 3               | 4              | 0.191             |
| <i>emm56</i>          | 1            | 1     | 0               | 2              | 0.590             |
| <i>emm58</i>          | 1            | 1     | 1               | 3              | 0.998             |
| <i>emm59</i>          | 2            | 0     | 2               | 4              | 0.391             |
| <i>emm6</i>           | 6            | 6     | 7               | 19             | 0.973             |
| <i>emm65</i>          | 2            | 3     | 4               | 9              | 0.736             |
| <i>emm71</i>          | 0            | 1     | 2               | 3              | 0.384             |
| <i>emm74</i>          | 1            | 0     | 3               | 4              | 0.195             |
| <i>emm75</i>          | 5            | 4     | 4               | 13             | 0.929             |
| <i>emm76</i>          | 1            | 0     | 2               | 3              | 0.395             |
| <i>emm77</i>          | 0            | 3     | 0               | 3              | <b>0.041*</b>     |
| <i>emm81</i>          | 6            | 3     | 4               | 13             | 0.613             |
| <i>emm82</i>          | 2            | 0     | 2               | 4              | 0.391             |
| <i>emm87</i>          | 1            | 1     | 0               | 2              | 0.590             |
| <i>emm89</i>          | 15           | 17    | 7               | 40             | 0.073             |
| <i>emm91</i>          | 4            | 3     | 1               | 8              | 0.399             |
| <i>emm92</i>          | 1            | 1     | 3               | 5              | 0.486             |
| <i>emm93</i>          | 0            | 0     | 3               | 3              | 0.058             |
| <i>emm95</i>          | 1            | 0     | 1               | 2              | 0.626             |
| <i>emm98</i>          | 1            | 2     | 1               | 4              | 0.740             |
| <b>Total Isolates</b> | 157          | 149   | 163             | 469            |                   |

\*Indicates a statistically significant values from the Chi-squared goodness-of-fit test. Statistically significant associations based on a low sample number (n<5) are indicated by italics.

**Supplementary Table 3:** Summary of datasets used for lineage-based phylogenetic analysis of the four most prevalent *emm*-types in the study population.

|              | <b>Isolates<br/>(this study)</b> | <b>Context isolates<br/>(public)</b> | <b>Context<br/>isolates (NZ)</b> | <b>Number of<br/>Countries</b> | <b>MLST<br/>(n)</b> | <b>Subtypes<br/>(n)</b> | <b>Reference<br/>strain</b> |
|--------------|----------------------------------|--------------------------------------|----------------------------------|--------------------------------|---------------------|-------------------------|-----------------------------|
| <i>emm1</i>  | 59                               | 226                                  | 6                                | 13                             | 4                   | 14                      | MGAS5005                    |
| <i>emm89</i> | 39                               | 97                                   | 8                                | 11                             | 13                  | 8                       | MGAS23530                   |
| <i>emm12</i> | 35                               | 162                                  | 8                                | 13                             | 15                  | 24                      | HKU16                       |
| <i>emm4</i>  | 28                               | 82                                   | 0                                | 10                             | 21                  | 4                       | MGAS10750                   |

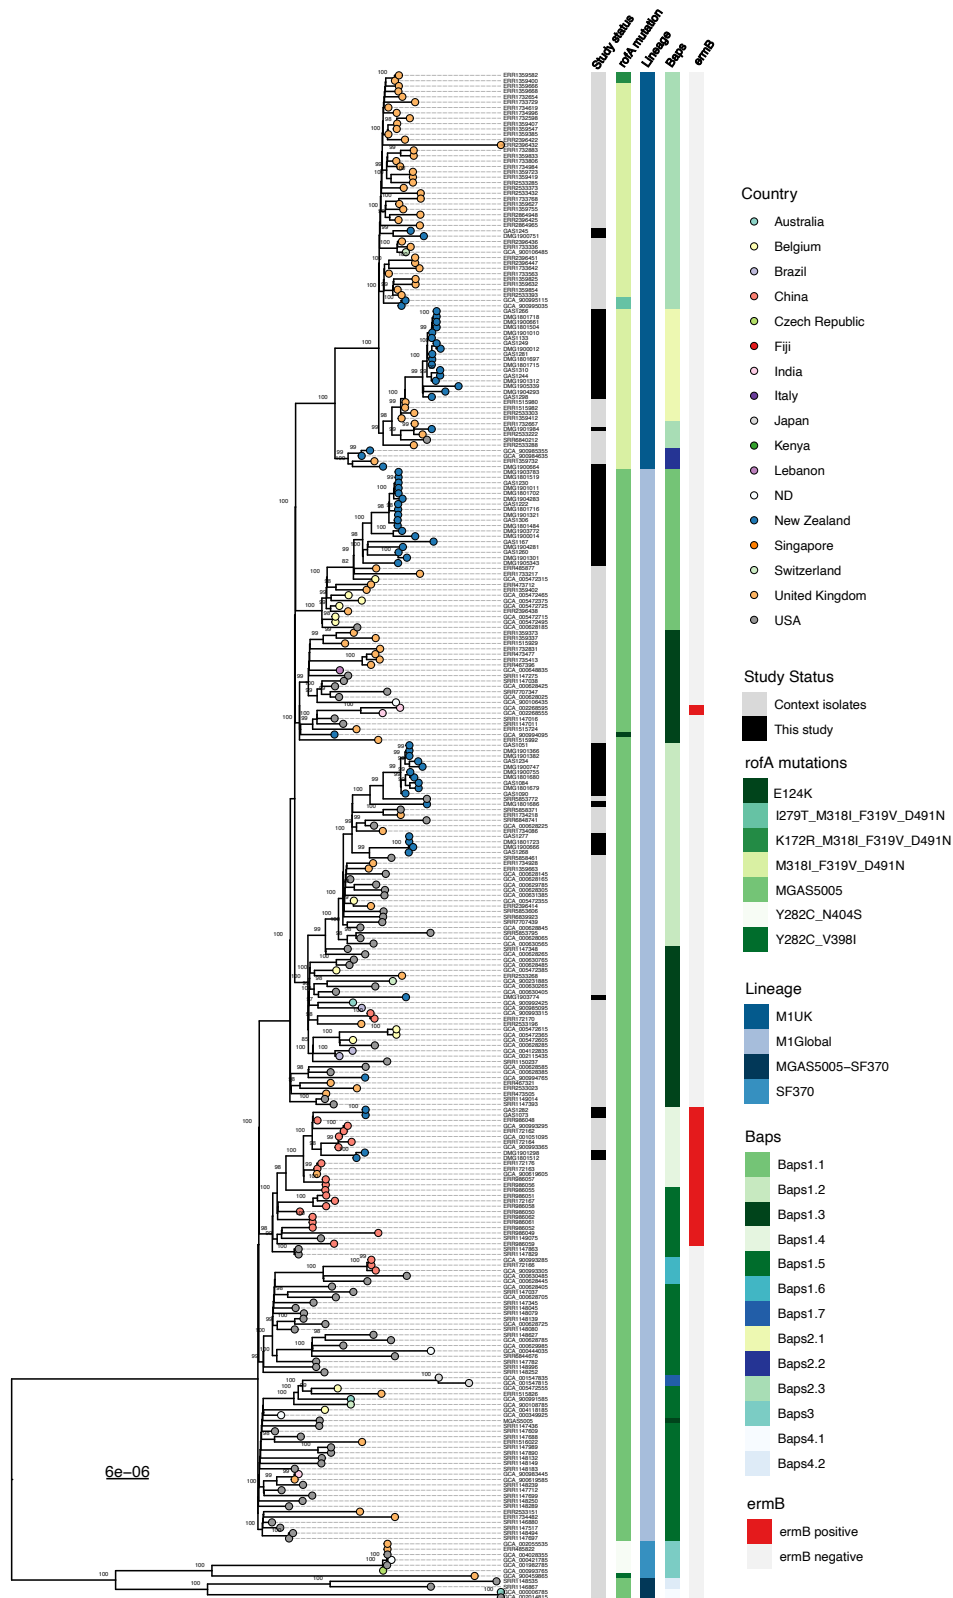

**Supplementary Figure 2:** Maximum likelihood phylogeny of 59 Auckland *emmI* genomes from this study with 226 global context isolates. The tree was inferred from 766 parsimony informative sites from a core genome alignment against the MGAS5005 reference genome. Annotation as follows; tip colour refers to country of origin for each genome “dark blue” = Aotearoa/New Zealand. Heatmaps include (a) Context “black” = this study, “grey” = context isolates, (b) *rofA* mutations in shades of green, (c) Baps grouping and Lineage in shades of blue, (d) baps2 groupings and (e) *ermB* gene presence “red” = positive, “grey” = negative.

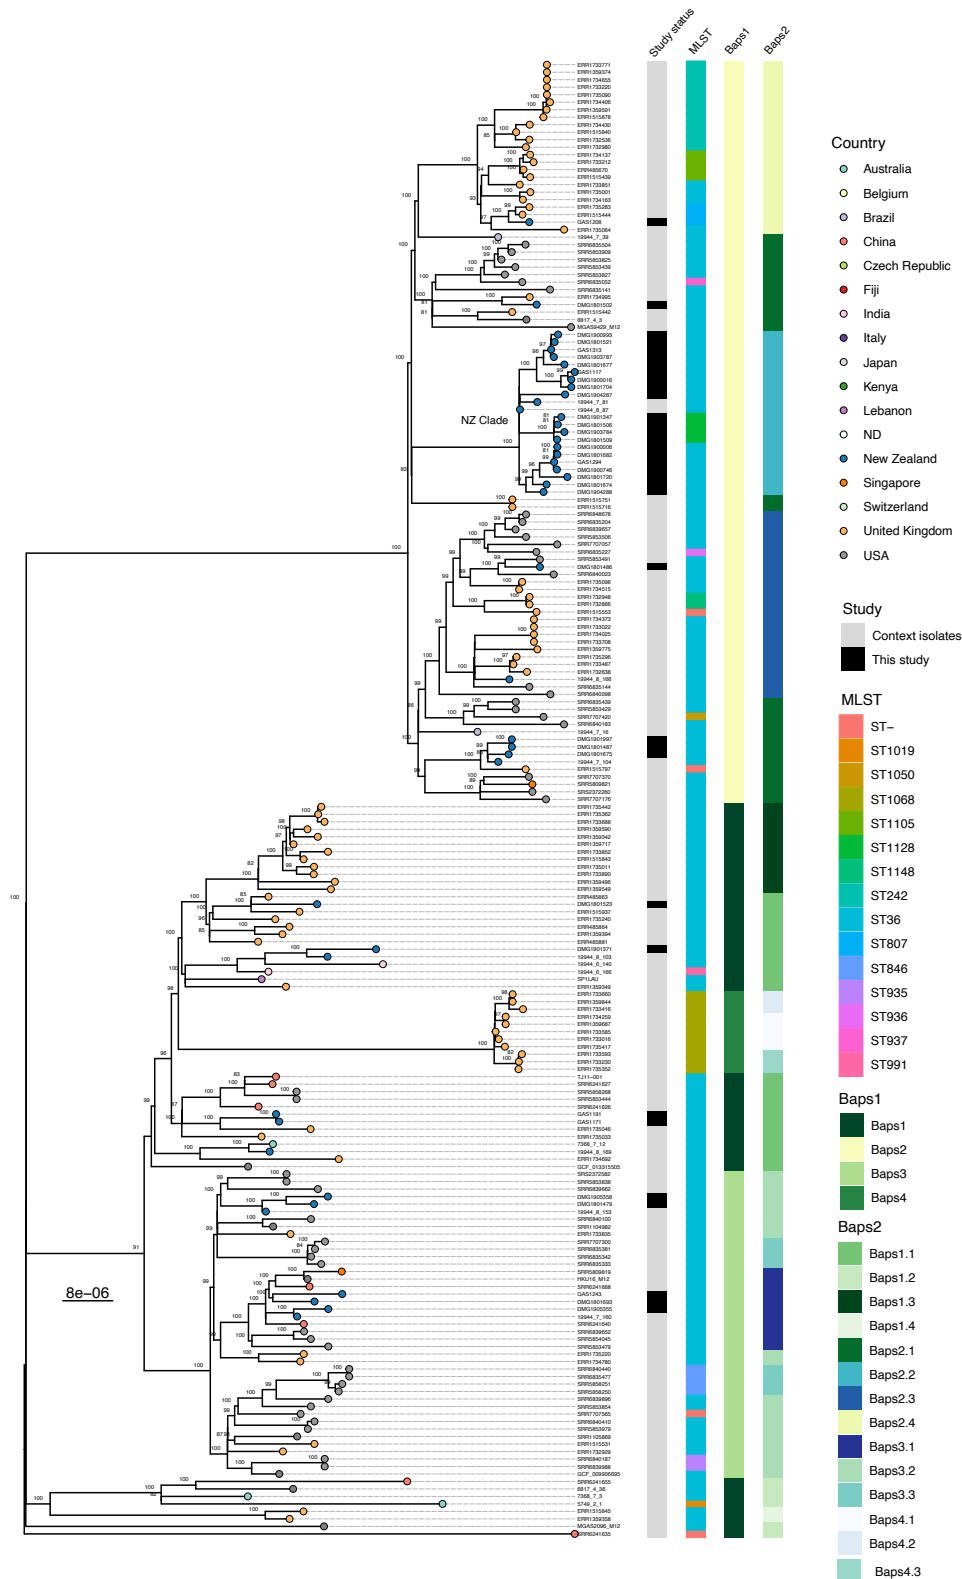

**Supplementary Figure 3:** Maximum likelihood phylogeny of 35 Auckland *emm12* genomes from this study with 162 global context isolates. The tree was inferred from 1,239 parsimony informative sites from a core genome alignment against the HKU16 M12 reference genome. Phylogenetic tree is annotated as follows; tip colour refers to country of origin for each genome “dark blue” = Aotearoa/New Zealand. Heatmaps include (a) Context “black” = this study, “grey” = context isolates, (b) MLST typing, (c) Baps1 grouping, (d) Baps2 groupings.

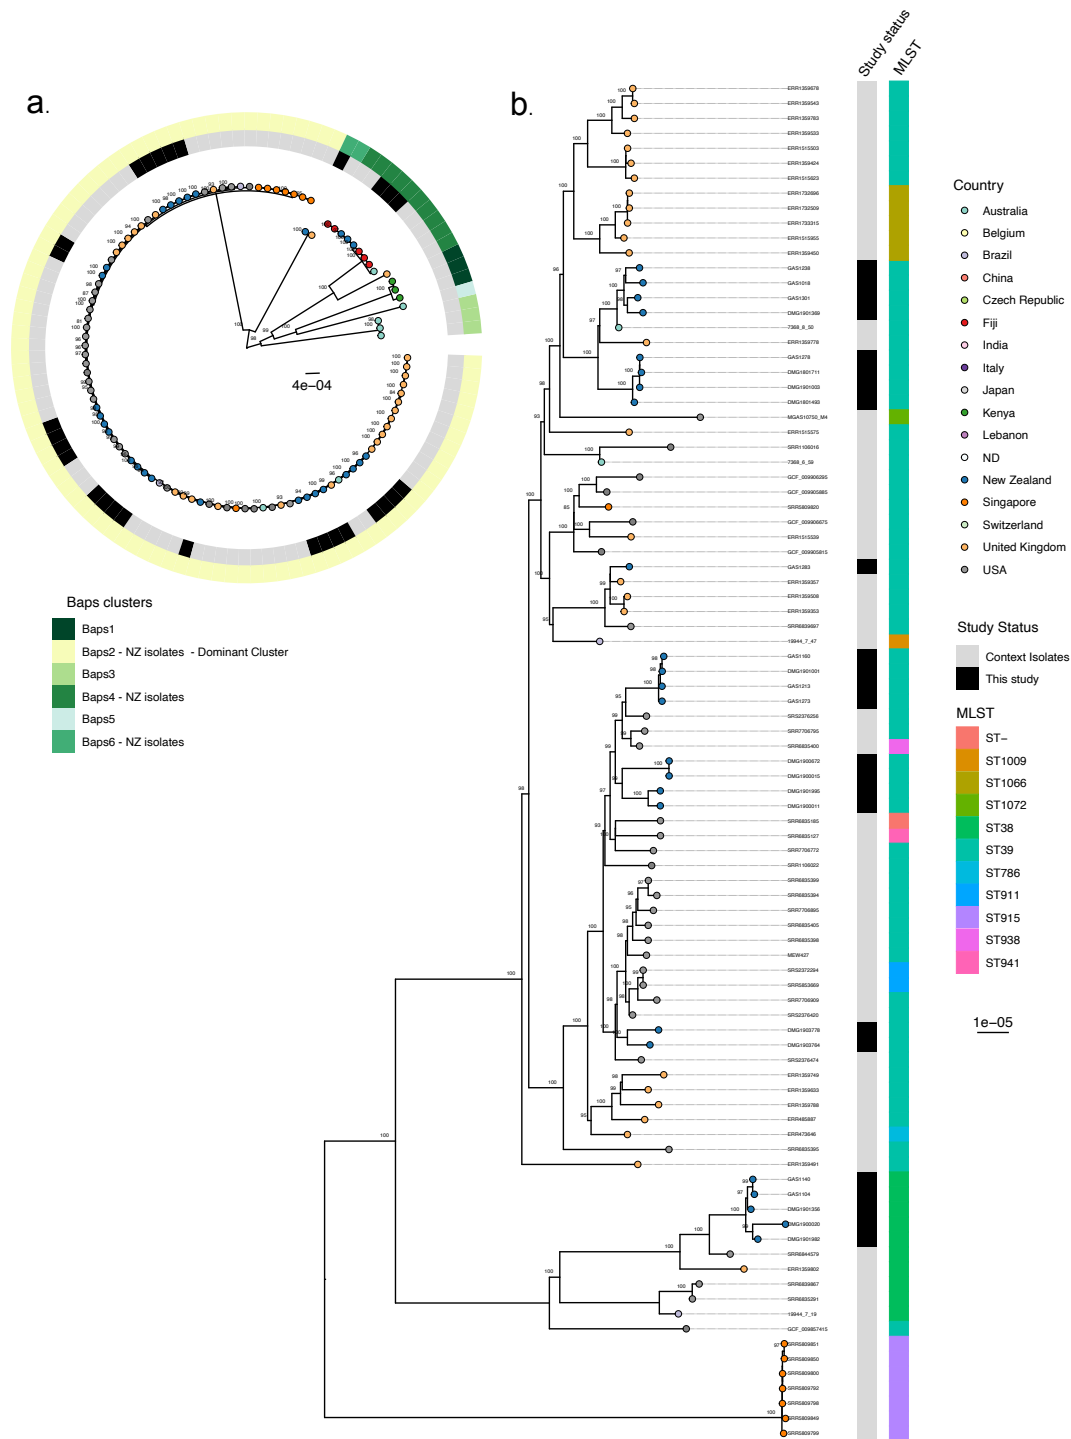

**Supplementary Figure 4. Analysis of the *emm4* genomes (A)** Maximum likelihood phylogeny of 28 Auckland *emm4* genomes from this study with 82 global context isolates. The tree was inferred from 26,868 parsimony informative sites from a core genome alignment against the MGAS10750 M4 reference genome. Phylogenetic tree is annotated as follows; tip colour refers to country of origin for each genome “dark blue” = Aotearoa/New Zealand. Inner ring refers to study context “black” = this study, “grey” = context isolates, and outer ring refers to Baps clusters. **(B)** Maximum likelihood phylogeny of 24 Auckland *emm4* genomes in the dominant sequence cluster (Baps2) from this study with 67 global contexts. The tree was inferred from 1,227 parsimony informative sites from a core genome alignment against the MGAS10750 M4 reference genome. Phylogenetic tree is annotated as follows; tip colour refers to country of origin for each genome “dark blue” = Aotearoa/New Zealand. Heatmaps include (a) Study context “black” = this study, “grey” = context isolates, (b) MLST typing.

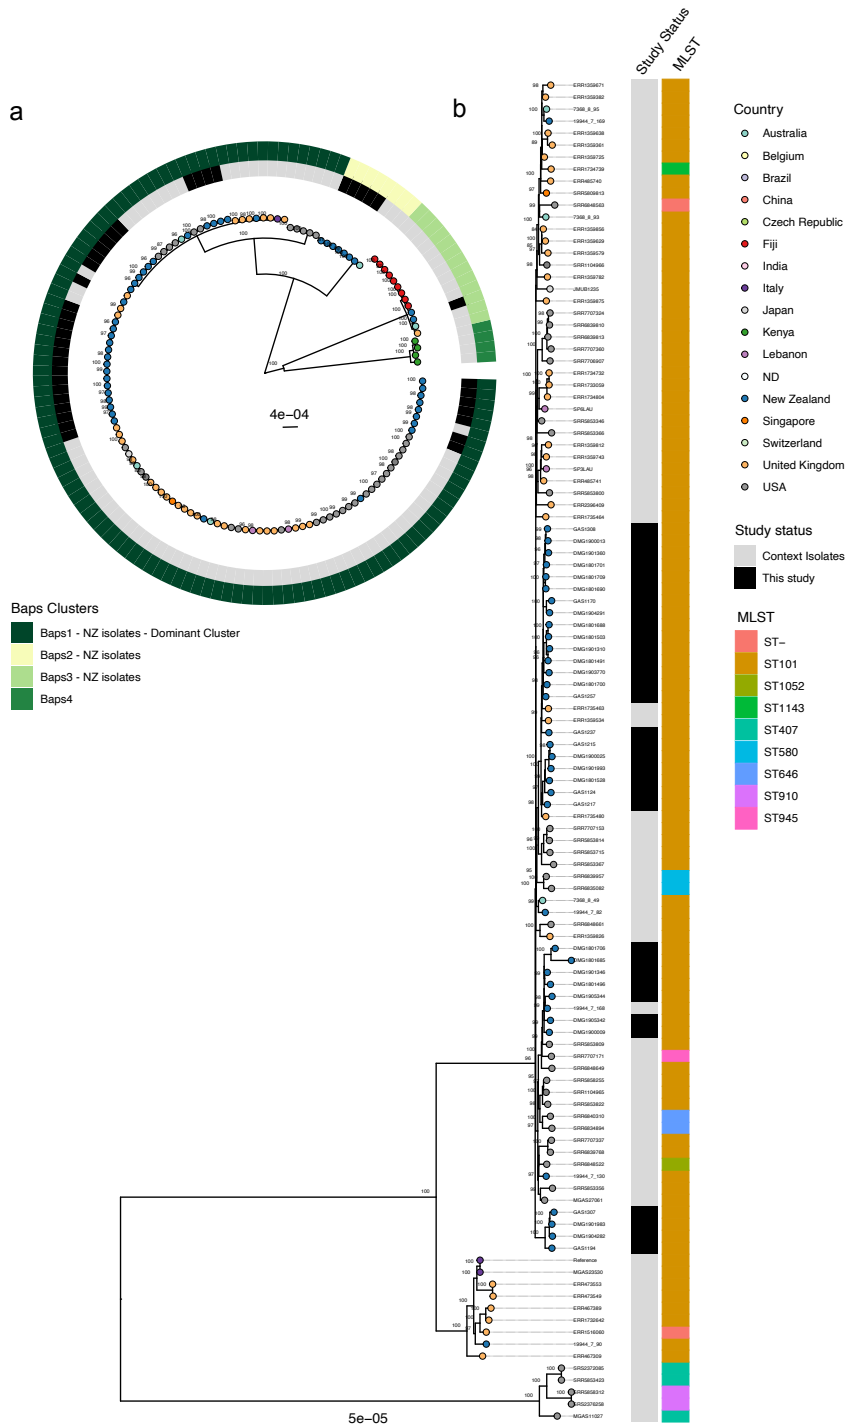

**Supplementary Figure 5: Analysis of the *emm89* genomes. (A)** Maximum likelihood phylogeny of 39 Auckland *emm89* genomes from this study with 97 global context isolates. The tree was inferred from 21,052 parsimony informative sites from a core genome alignment against the MGAS23530 reference genome. Phylogenetic tree is annotated as follows; tip colour refers to country of origin for each genome “dark blue” = Aotearoa/New Zealand. Inner ring refers to study context “black” = this study, “grey” = context isoaltes, and outer ring refers to Baps clusters. **(B)** Maximum likelihood phylogeny of 33 Auckland *emm4* genomes isolates of the dominant sequence cluster (Baps1) from this study with 78 global contexts. The tree was inferred from 2,106 parsimony informative sites from a core genome alignment against the MGAS23530 reference genome. Phylogenetic tree is annotated as follows; tip colour refers to country of origin for each genome “dark blue” = Aotearoa/New Zealand. Heatmaps include (a) Context “black” = this study, “grey” = context isolates, (b) MLST typing.



**Supplementary Table 4:** Summary of virulence gene prevalence within Auckland GAS isolates.

| <b>Class</b>         | <b>Gene</b>     | <b>No isolates positive* (%)</b> | <b>Unique variants (amino acid)</b> |
|----------------------|-----------------|----------------------------------|-------------------------------------|
| Streptodornase/DNAse | <i>spd1/mf2</i> | 187 (40%)                        | 5                                   |
|                      | <i>spd2/mf1</i> | 469 (100%)                       | 13                                  |
|                      | <i>spd3/mf3</i> | 206 (44%)                        | 8                                   |
|                      | <i>spd4/mf4</i> | 17 (4%)                          | 1                                   |
|                      | <i>sda</i>      | 94 (20%)                         | 2                                   |
|                      | <i>sdn</i>      | 69 (15%)                         | 4                                   |
| Superantigens        | <i>speG</i>     | 349 (75%)                        | 17                                  |
|                      | <i>smeZ</i>     | 157 (34%)                        | 3                                   |
|                      | <i>speC</i>     | 157 (34%)                        | 3                                   |
|                      | <i>speJ</i>     | 157 (34%)                        | 3                                   |
|                      | <i>speA</i>     | 82 (17%)                         | 6                                   |
|                      | <i>ssa</i>      | 76 (16%)                         | 1                                   |
|                      | <i>speL</i>     | 75 (16%)                         | 7                                   |
|                      | <i>speK</i>     | 72 (15%)                         | 6                                   |
|                      | <i>speH</i>     | 71 (15%)                         | 5                                   |
|                      | <i>speI</i>     | 41 (9%)                          | 1                                   |
|                      | <i>speR</i>     | 21 (4%)                          | 4                                   |
|                      | <i>speM</i>     | 14 (3%)                          | 4                                   |
|                      | <i>speQ</i>     | 12 (3%)                          | 3                                   |
|                      | Capsule         | <i>hasA</i>                      | 469 (100%)                          |
| <i>hasB</i>          |                 | 371 (80%)                        | 41                                  |
| <i>hasC</i>          |                 | 289 (62%)                        | 36                                  |
| Regulators           | <i>mga1</i>     | 136 (29%)                        | 12                                  |
|                      | <i>mga2</i>     | 315 (67%)                        | 40                                  |
|                      | <i>rofA</i>     | 328 (70%)                        | 42                                  |
|                      | <i>nra</i>      | 107 (22%)                        | 11                                  |
| Other                | <i>sla</i>      | 97 (20%)                         | 2                                   |
|                      | <i>ska1</i>     | 170 (36%)                        | 14                                  |
|                      | <i>ska2</i>     | 297 (63%)                        | 48                                  |

**Supplementary Table 5:** Summary of antimicrobial resistance gene prevalence within Auckland GAS isolates.

| <b>Class</b>   | <b>Gene</b>         | <b>No isolate positive (%)</b> |
|----------------|---------------------|--------------------------------|
| Aminoglycoside | <i>aph(3')-IIIa</i> | 1 (<1%)                        |
| Macrolide      | <i>erm(A)</i>       | 3 (1%)                         |
| Macrolide      | <i>erm(B)</i>       | 7 (1%)                         |
| Aminoglycoside | <i>mef(A)</i>       | 2 (<1%)                        |
| Aminoglycoside | <i>msr(D)</i>       | 2 (<1%)                        |
| Tetracycline   | <i>tet(M)</i>       | 74 (16%)                       |
| Tetracycline   | <i>tet(O)</i>       | 1 (<1%)                        |

**Supplementary Table 6: Theoretical coverage provided by the 30-valent StreptAnova vaccine.** Values are presented assuming cross-opsonisation or no cross-opsonisation in the prioritised ethnic groups, VE – Vaccine *emm*-type, NVE – Non-vaccine *emm*-type, CO – cross opsonisation.

|                                            | <b>Total</b>             |                  | <b>Māori</b>             |                  | <b>Pacific Peoples</b>   |                  | <b>Other</b>             |                  |
|--------------------------------------------|--------------------------|------------------|--------------------------|------------------|--------------------------|------------------|--------------------------|------------------|
|                                            | No. <i>emm</i> types (%) | No. isolates (%) | No. <i>emm</i> types (%) | No. isolates (%) | No. <i>emm</i> types (%) | No. isolates (%) | No. <i>emm</i> types (%) | No. isolates (%) |
| <b>Total <i>emm</i> types and isolates</b> | 49 (100)                 | 469 (100)        | 36 (100)                 | 157 (100)        | 43 (100)                 | 163 (100)        | 32 (100)                 | 149 (100)        |
| <b>Assuming no cross-opsonisation</b>      |                          |                  |                          |                  |                          |                  |                          |                  |
| <b>VE in dataset</b>                       | 21 (42.9)                | 329 (70.2)       | 18 (50.0)                | 117 (74.7)       | 18 (41.9)                | 84 (51.2)        | 19 (59.4)                | 128 (86.0)       |
| <b>NVE in dataset</b>                      | 28 (57.1)                | 140 (29.8)       | 18 (50.0)                | 40 (25.3)        | 25 (58.1)                | 79 (48.8)        | 13 (40.6)                | 21 (14.0)        |
| <b>Assuming cross-opsonisation</b>         |                          |                  |                          |                  |                          |                  |                          |                  |
| <b>CO positive and VE in dataset</b>       | 29 (59.2)                | 372 (79.4)       | 22 (61.1)                | 128 (81.6)       | 26 (60.5)                | 111 (67.9)       | 22 (68.8)                | 133 (89.3)       |
| <b>CO negative and NVE in dataset</b>      | 20 (40.8)                | 97 (20.6)        | 14 (38.9)                | 29 (18.4)        | 17 (39.5)                | 52 (32.1)        | 10 (31.3)                | 16 (10.7)        |

**Supplementary Table 7: Theoretical coverage provided by the TeeVax vaccine.** Values are presented assuming cross-opsonisation or no cross-opsonisation and prioritised ethnic groups. VT – Vaccine *tee*-type, NVT – Non-vaccine *tee*-type, CR – cross reactivity only observed in two additional *tee*-types in this dataset *tee*18.2 and *tee*28.1

|                                            | <b>Total</b>             |                  | <b>Māori</b>             |                  | <b>Pacific Peoples</b>   |                  | <b>Other</b>             |                  |
|--------------------------------------------|--------------------------|------------------|--------------------------|------------------|--------------------------|------------------|--------------------------|------------------|
|                                            | No. <i>tee</i> types (%) | No. isolates (%) | No. <i>tee</i> types (%) | No. isolates (%) | No. <i>tee</i> types (%) | No. isolates (%) | No. <i>tee</i> types (%) | No. isolates (%) |
| <b>Total <i>tee</i> types and isolates</b> | 35 (100)                 | 469 (100)        | 27 (100)                 | 157 (100)        | 31 (100)                 | 163 (100)        | 25 (100)                 | 149 (100)        |
| <b>Assuming No Cross-reactivity</b>        |                          |                  |                          |                  |                          |                  |                          |                  |
| <b>VT in dataset</b>                       | 18 (51.4)                | 353 (75.2)       | 18 (66.6)                | 114 (72.6)       | 17 (54.8)                | 119 (73.0)       | 14 (56.0)                | 120 (80.5)       |
| <b>NVT in dataset</b>                      | 17 (48.6)                | 116 (24.8)       | 16 (33.4)                | 43 (27.4)        | 14 (45.2)                | 44 (27.0)        | 11 (44.0)                | 29 (19.5)        |
| <b>Assuming Cross-reactivity</b>           |                          |                  |                          |                  |                          |                  |                          |                  |
| <b>CR positive and VT in dataset</b>       | 20 (57.2)                | 381 (81.2)       | 18 (66.6)                | 126 (80.2)       | 19 (61.2)                | 128 (78.5)       | 15 (60.0)                | 127 (85.2)       |
| <b>CR negative and NVT in dataset</b>      | 15 (42.8)                | 88 (18.8)        | 9 (33.4)                 | 31 (19.8)        | 12 (38.8)                | 35 (21.4)        | 10 (40.0)                | 22 (14.8)        |
